# Supplementary material
Source: PubMed Central journal article supplement (PMC7669224)
Supplement: djaa032_supplementary_data.pdf [file djaa032_supplementary_data.pdf]

## Supplementary Materials

**Supplemental Table 1. Pathological and clinical variables of training and validation cohorts**

|                                |                 | Training (n, %) | Validation (n, %) |
|--------------------------------|-----------------|-----------------|-------------------|
| All patients                   |                 | 410             | 272               |
| Age of patients at surgery, yr |                 |                 |                   |
|                                | Mean            | 62.6            | 59.7              |
|                                | Median          | 63              | 61                |
|                                | Range (min-max) | 45-77           | 44-72             |
|                                | Missing         | 4 (1.0%)        | 0 (0.0%)          |
| PSA (ng/ml)                    |                 |                 |                   |
|                                | Mean            | 9               | 6.7               |
|                                | Median          | 7.2             | 5.8               |
|                                | Range (min-max) | 0.2-66.0        | 0.45-33.0         |
|                                | Missing         | 7 (1.7%)        | 5 (1.8%)          |
| Recurrence                     |                 |                 |                   |
|                                | Yes             | 143 (34.9%)     | 54 (19.9%)        |
|                                | No              | 260 (63.4%)     | 218 (80.1%)       |
|                                | Missing         | 7 (1.7%)        | 0 (0.0%)          |
| Follow-up time (yrs)           |                 |                 |                   |
|                                | Mean            | 6.7             | 5                 |
|                                | Median          | 5.7             | 4.9               |
|                                | Range (min-max) | 0.0-21.8        | 0.09-13.3         |
|                                | Missing         | 6 (1.5%)        | 34 (12.5%)        |
| Prostatectomy Grade Groups     |                 |                 |                   |
|                                | GG1             | 147 (35.8%)     | 70 (25.7%)        |
|                                | GG2             | 132 (32.2%)     | 170 (62.5%)       |
|                                | ≥GG3            | 122 (29.8%)     | 32 (11.8%)        |
|                                | Missing         | 9 (2.2%)        | 0 (0.0%)          |
| pStage                         |                 |                 |                   |
|                                | ≤pT2            | 295 (72.0%)     | 214 (78.7%)       |
|                                | pT3a            | 61 (14.9%)      | 50 (18.4%)        |
|                                | pT3b            | 48 (11.7%)      | 8 (2.9%)          |
|                                | Missing         | 6 (1.4%)        | 0 (0.0%)          |
| SVI                            |                 |                 |                   |
|                                | Yes             | 30              | 8                 |
|                                | No              | 376             | 264               |
|                                | Missing         | 4               | 0                 |
| EPE                            |                 |                 |                   |
|                                | Yes             | 104             | 58                |
|                                | No              | 302             | 214               |

|            |         |     |     |
|------------|---------|-----|-----|
|            | Missing | 4   | 0   |
| SM         | Yes     | 136 | 37  |
|            | No      | 265 | 235 |
|            | Missing | 9   | 0   |
| ERG Fusion | Yes     | 192 | 171 |
|            | No      | 181 | 79  |
|            | Missing | 37  | 22  |
| PTEN Loss  | Yes     | 98  | 54  |
|            | No      | 279 | 203 |
|            | Missing | 33  | 15  |

---

PSA=prostate specific antigen, GG=grade group, pStage=pathological stage, SVI=Seminal Vesicle Invasion, EPE=Extra-prostatic Extension, SM=Surgical Margin

**Supplemental Table 2. Immunohistochemical staining conditions and imaging techniques**

|                          | CHUM cohort              |                          | KHSC and Brazil cohorts     |                           |
|--------------------------|--------------------------|--------------------------|-----------------------------|---------------------------|
|                          | PTEN                     | ERG                      | PTEN                        | ERG                       |
| Staining platform        | Benchmark XT*            | Benchmark XT*            | Discovery XT†               | Discovery XT†             |
| Antibody clone ID        | SP218                    | 9FY                      | D4.3 XP                     | EPR3864                   |
| Antibody species         | Rabbit mAb               | Mouse mAb                | Rabbit mAb                  | Rabbit mAb                |
| Vendor for antibody      | Spring Bioscience        | Biocare Medical          | Cell Signaling Technologies | Epitomics                 |
| Antibody dilution        | 1 : 50                   | 1 : 25                   | 1 : 100                     | 1 : 50                    |
| Pre-treatment solution   | CC1‡                     | CC1‡                     | CC1‡                        | CC1‡                      |
| Antigen retrieval time   | 60 min                   | 90 min                   | 60 min                      | 60 min                    |
| Detection kit            | UltraView Universal DAB§ | UltraView Universal DAB§ | DISCOVERY OmniMap           | DISCOVERY OmniMap         |
| Slides scanner           | Olympus                  | Olympus                  | Aperio (Leica Biosystems)   | Aperio (Leica Biosystems) |
| Digital scoring software | HALO (Indica Labs)       | HALO (Indica Labs)       | HALO (Indica Labs)          | HALO (Indica Labs)        |

\*Benchmark XT, Ventana Medical System, Inc., Tucson, AZ, USA

†Discovery XT, Ventana Medical System, Inc., Tucson, AZ, USA

‡CC1, Cell Conditioning 1, Ventana Medical System Inc., Catalog #950-124

§UltraView Universal DAB, Ventana Medical Systems, Inc.

||DISCOVERY OmniMap, Ventana Medical Systems, Inc.

**Supplemental Table 3a. Association of PTEN and ERG immunohistochemistry status with clinicopathologic factors in the training cohort**

|                           | PTEN status |             | p-value  | ERG fusion  |             | p-value |
|---------------------------|-------------|-------------|----------|-------------|-------------|---------|
|                           | Any loss    | Intact      |          | No          | Yes         |         |
| <b>Prostatectomy</b>      |             |             |          |             |             |         |
| <b>Grade Groups</b>       |             |             |          |             |             |         |
| GG1                       | 28 (19.7%)  | 114 (80.3%) | 0.09     | 66 (47.5%)  | 73 (52.5%)  | 0.60    |
| GG2                       | 34 (27.2%)  | 91 (72.8%)  |          | 59 (47.6%)  | 65 (52.4%)  |         |
| ≥GG3                      | 32 (31.7%)  | 69 (68.3%)  |          | 54 (53.5%)  | 47 (46.5%)  |         |
| Total                     | 94 (25.5%)  | 274 (74.5%) |          | 179 (49.2%) | 185 (50.8%) |         |
| Missing                   | 42 (11.4%)  |             |          | 46 (12.6%)  |             |         |
| <b>Time to Recurrence</b> |             |             |          |             |             |         |
| No                        | 47 (20.0%)  | 188 (80.0%) | < 0.001* | 111 (47.6%) | 122 (52.4%) | 0.49*   |
| Yes                       | 49 (36.3%)  | 86 (63.7%)  |          | 68 (51.1%)  | 65 (48.9%)  |         |
| Total                     | 96 (25.9%)  | 274 (74.1%) |          | 179 (48.9%) | 187 (51.1%) |         |
| Missing                   | 38 (10.3%)  |             |          | 44 (12.0%)  |             |         |
| <b>pStage</b>             |             |             |          |             |             |         |
| T2                        | 59 (21.6%)  | 214 (78.4%) | 0.009    | 137 (50.9%) | 132 (49.1%) | 0.35    |
| T3a                       | 22 (37.3%)  | 37 (62.7%)  |          | 24 (40.7%)  | 35 (59.3%)  |         |
| T3b                       | 15 (37.5%)  | 25 (62.5%)  |          | 19 (47.5%)  | 21 (52.5%)  |         |
| Total                     | 96 (25.8%)  | 276 (74.2%) |          | 180 (48.9%) | 188 (51.1%) |         |
| Missing                   | 38 (10.2%)  |             |          | 42 (11.4%)  |             |         |
| <b>PTEN Loss</b>          |             |             |          |             |             |         |
| No                        |             |             |          | 37 (37.8%)  | 61 (62.2%)  | 0.01†   |
| Yes                       |             |             |          | 144 (52.4%) | 131 (47.6%) |         |
| Total                     |             |             |          | 181 (48.5%) | 192 (51.5%) |         |
| Missing                   |             |             |          | 37 (9.9%)   |             |         |
| <b>SVI</b>                |             |             |          |             |             |         |
| No                        | 89(25.4%)   | 261 (74.6%) | 0.62†    | 167 (48.3%) | 179 (51.7%) | 0.52†   |
| Yes                       | 7 (30.4%)   | 16 (69.6%)  |          | 13 (56.5%)  | 10 (43.5%)  |         |
| Total                     | 96 (25.7%)  | 277 (74.3%) |          | 180 (48.8%) | 189 (51.2%) |         |
| Missing                   | 37 (9%)     |             |          | 41 (10%)    |             |         |
| <b>EPE</b>                |             |             |          |             |             |         |
| No                        | 59 (21.5%)  | 215 (78.5%) | 0.003†   | 138 (51.1%) | 132 (48.9%) | 0.16†   |
| Yes                       | 37 (37.4%)  | 62 (62.6%)  |          | 42 (42.4%)  | 57 (57.6%)  |         |
| Total                     | 96 (25.7%)  | 277 (74.3%) |          | 180 (48.8%) | 189 (51.2%) |         |
| Missing                   | 37 (9%)     |             |          | 41 (10%)    |             |         |
| <b>SM</b>                 |             |             |          |             |             |         |
| No                        | 58 (76.4%)  | 188 (76.4%) | 0.17†    | 119 (49.2%) | 123 (50.8%) | 0.91†   |
| Yes                       | 37 (30.3%)  | 85 (69.7%)  |          | 59 (48.4%)  | 63 (51.6%)  |         |
| Total                     | 95 (25.8%)  | 273 (74.2%) |          | 178 (48.9%) | 186 (51.1%) |         |
| Missing                   | 42 (10.2%)  |             |          | 46 (11.2%)  |             |         |

PSA=prostate specific antigen, GG=grade group, pStage=pathological stage, SVI=Seminal Vesicle Invasion, EPE=Extra-prostatic Extension, SM=Surgical Margin; \* Log Rank test † Fisher exact test

**Supplemental Table 3b. Association of PTEN and ERG immunohistochemistry status with clinicopathologic factors in the validation cohort**

|                           | PTEN status |             | p-value  | ERG fusion |             | p-value |
|---------------------------|-------------|-------------|----------|------------|-------------|---------|
|                           | Any loss    | Intact      |          | No         | Yes         |         |
| <b>Prostatectomy</b>      |             |             |          |            |             |         |
| <b>Grade Groups</b>       |             |             |          |            |             |         |
| GG1                       | 4 (6.8%)    | 55 (93.2%)  | 0.001    | 22 (40.0%) | 33 (60.0%)  | 0.19    |
| GG2                       | 46 (27.7%)  | 120 (72.3%) |          | 50 (30.7%) | 113 (69.3%) |         |
| ≥GG3                      | 4 (12.5%)   | 28 (87.5%)  |          | 7 (21.9%)  | 25 (78.1%)  |         |
| Total                     | 54 (21.0%)  | 203 (79.0%) |          | 79 (31.6%) | 171 (68.4%) |         |
| Missing                   | 15 (5.8%)   |             |          | 22 (8.8%)  |             |         |
| <b>Time to Recurrence</b> |             |             |          |            |             |         |
| No                        | 32 (15.7%)  | 172 (84.3%) | < 0.001* | 64 (32.3%) | 134 (67.7%) | 0.55*   |
| Yes                       | 22 (41.5%)  | 31 (58.5%)  |          | 15 (28.8%) | 37 (71.2%)  |         |
| Total                     | 54 (21.0%)  | 203 (79.0%) |          | 79 (31.6%) | 171 (68.4%) |         |
| Missing                   | 15 (5.8%)   |             |          |            | 22 (8.8%)   |         |
| <b>pStage</b>             |             |             |          |            |             |         |
| T2                        | 31 (15.6%)  | 168 (84.4%) | 0.001    | 68 (35.4%) | 124 (64.6%) | 0.06    |
| T3a                       | 20 (40.0%)  | 30 (60.0%)  |          | 9 (18.0%)  | 41 (82.0%)  |         |
| T3b                       | 3 (37.5%)   | 5 (62.5%)   |          | 2 (25.0%)  | 6 (75.0%)   |         |
| Total                     | 54 (21.0%)  | 203 (79.0%) |          | 79 (31.6%) | 171 (68.4%) |         |
| Missing                   | 15 (5.8%)   |             |          | 22 (8.8%)  |             |         |
| <b>PTEN status</b>        |             |             |          |            |             |         |
| No                        |             |             |          | 12 (22.6%) | 41 (77.4%)  | 0.14†   |
| Yes                       |             |             |          | 66 (33.7%) | 130 (66.3%) |         |
| Total                     |             |             |          | 78 (31.3%) | 171 (68.7%) |         |
| Missing                   |             |             |          | 23 (9.2%)  |             |         |
| <b>SVI</b>                |             |             |          |            |             |         |
| No                        | 51 (20.5%)  | 198 (79.5%) | 0.37†    | 77 (31.8%) | 165 (68.2%) | 1.00†   |
| Yes                       | 3 (37.5%)   | 5 (62.5%)   |          | 2 (25%)    | 6 (75%)     |         |
| Total                     | 54 (21%)    | 203 (79%)   |          | 79 (31.6%) | 171 (68.4%) |         |
| Missing                   | 15 (5.5%)   |             |          |            | 22 (8.8%)   |         |
| <b>EPE</b>                |             |             |          |            |             |         |
| No                        | 31 (15.6%)  | 168 (84.4%) | <0.001†  | 68 (35.4%) | 124 (64.6%) | 0.02†   |
| Yes                       | 23 (39.7%)  | 35 (60.3%)  |          | 11 (19%)   | 47(81%)     |         |
| Total                     | 54 (21%)    | 203 (79%)   |          | 79 (31.6%) | 121 (68.4%) |         |
| Missing                   | 15 (5.5%)   |             |          |            | 22 (8.8%)   |         |
| <b>SM</b>                 |             |             |          |            |             |         |
| No                        | 44 (20%)    | 176 (80%)   | 0.38†    | 70 (32.9%) | 143 (67.1%) | 0.34†   |
| Yes                       | 10 (27%)    | 27 (73%)    |          | 9 (24.3%)  | 28 (75.7%)  |         |
| Total                     | 54 (21%)    | 203 (79%)   |          | 79 (31.6%) | 121 (68.4%) |         |

---

PSA=prostate specific antigen, GG=grade group, pStage=pathological stage, SVI=Seminal Vesicle Invasion, EPE=Extra-prostatic Extension, SM=Surgical Margin; \* Log Rank test † Fisher exact test

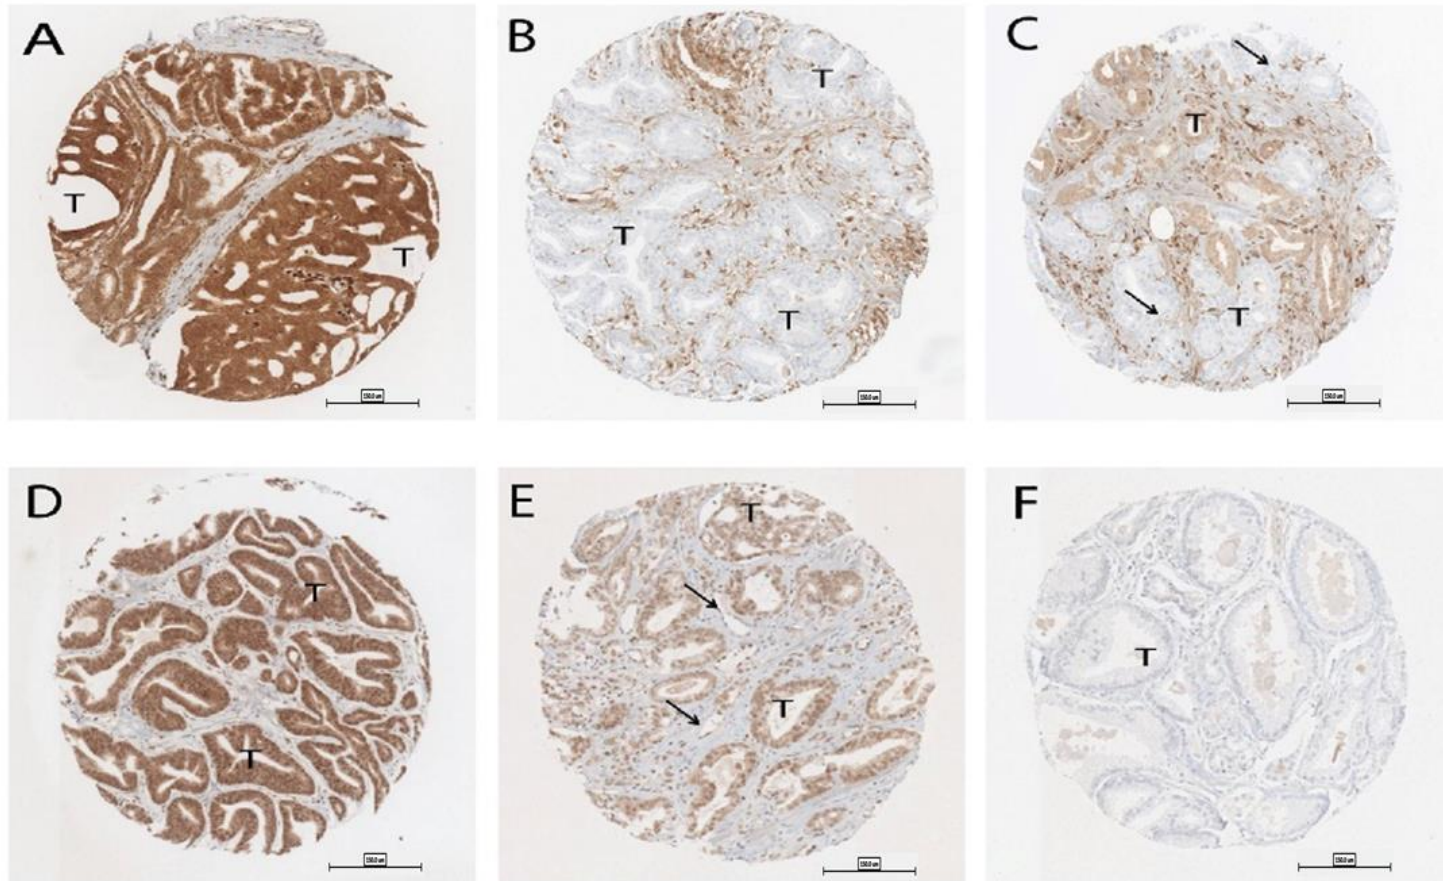

**Supplemental Figure 1. Immunohistochemical staining patterns of PTEN and ERG.** A, Intact PTEN; Tumor tissue has similar immunostaining intensity to surrounding stromal cells. B, Complete PTEN protein loss; PTEN protein is lost in 100% of sampled tumor cores. C, Partial PTEN protein loss; PTEN protein loss is seen in the subset of tumor cells (arrows). D, ERG positive core; ERG oncoprotein is markedly over-expressed. Staining intensity +3, % of positive cells 100% (homogeneous). Non-specific positive cytoplasmic staining/blush was ignored from scoring. E, ERG positive core; ERG protein is expressed but with less staining intensity (+2) compared to core A (number of positive cells 100% =homogeneous). Note, positive endothelial staining was used as internal control

(arrows). F, ERG negative core; ERG protein expression is completely negative (staining intensity 0). Tumor regions are indicated as “T” on the images, and benign regions as “B”. Scale bars=150.0um



## Training Cohort

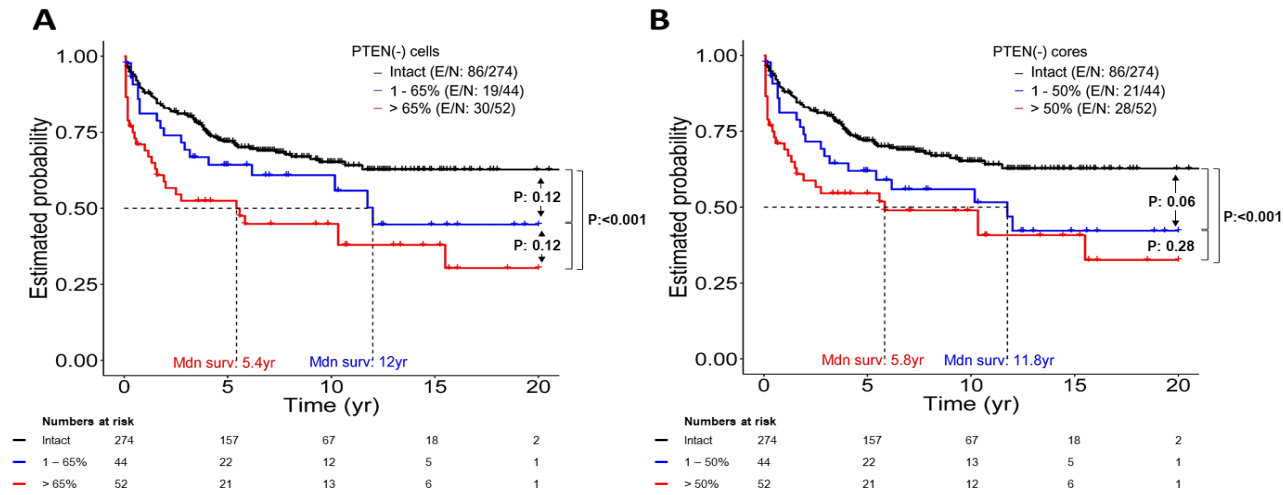

## Validation Cohort

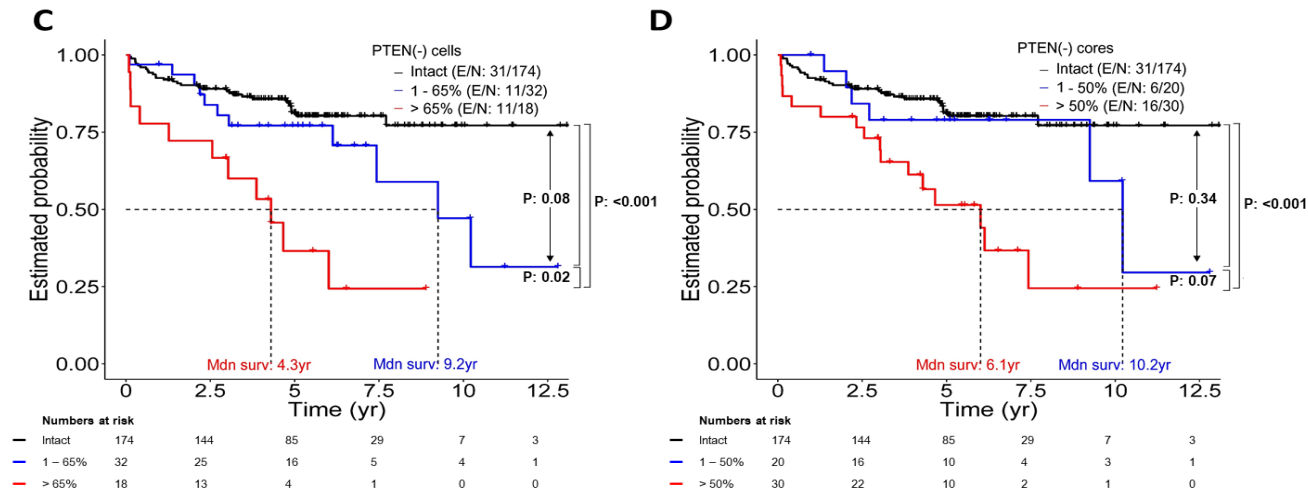

**Supplemental Figure 2. Kaplan-Meier curves for biochemical recurrence-free survival stratified by qPTEN thresholds. Training cohort data is represented in panels A-B and validation cohort data is shown in panels C-D.**

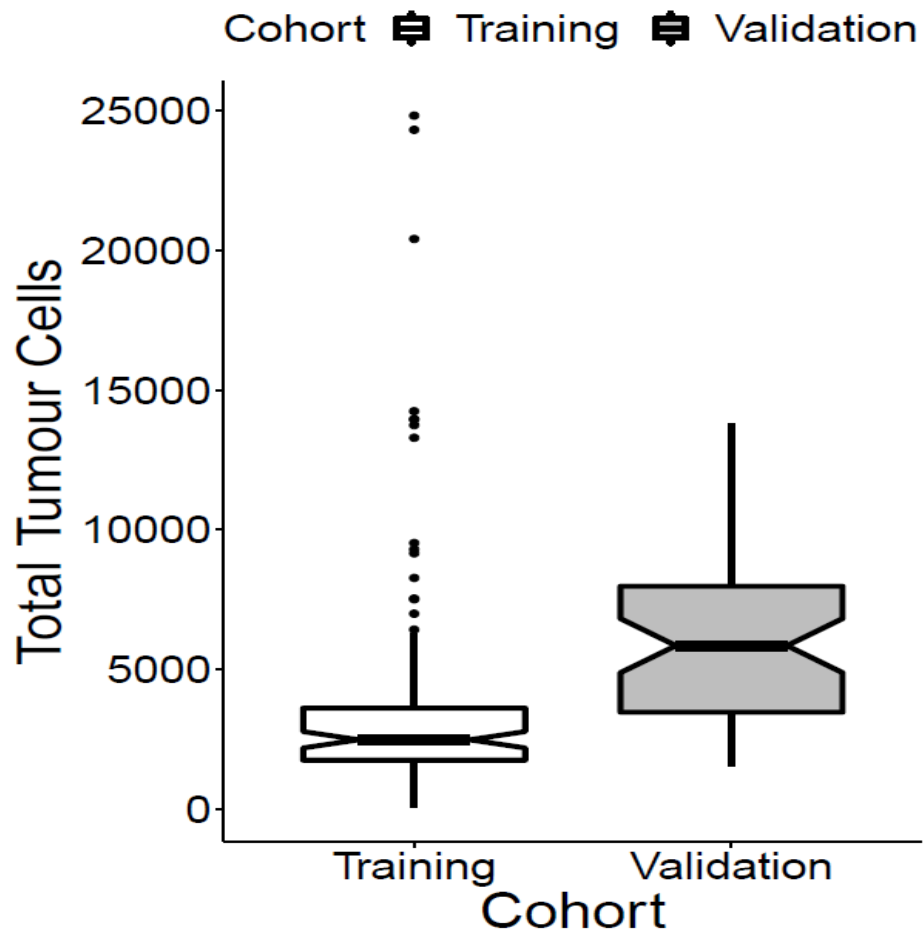

**Supplemental Figure 3: Boxplot showing distributions of data=tumor cells in sampled tissue cores from training and validation cohorts.**
